# Supplementary material for: A Web Server and Mobile App for Computing Hemolytic Potency of Peptides
Source: PubMed Central journal article supplement (PMC4782144; doi:10.1038/srep22843), 2016-03-08
Supplement: srep22843-s1.pdf [file srep22843-s1.pdf]

# **A Web Server and Mobile App for Computing Hemolytic Potency of Peptides**

**Kumardeep Chaudhary<sup>#,1</sup>, Ritesh Kumar<sup>#,2</sup>, Sandeep Singh<sup>#,1</sup>, Abhishek Tuknait<sup>#,1</sup>, Ankur Gautam<sup>1</sup>, Deepika Mathur<sup>1</sup>, Priya Anand<sup>1</sup>, Grish C. Varshney<sup>3</sup> and Gajendra P.S. Raghava<sup>\*,1</sup>**

<sup>1</sup>Bioinformatics Centre, CSIR-Institute of Microbial Technology, Sector 39A, Chandigarh, India

<sup>2</sup>CSIR-Central Scientific Instruments Organisation, Sector 30C, Chandigarh, India

<sup>3</sup>Cell Biology and Immunology Division, CSIR-Institute of Microbial Technology, Chandigarh, India

# Authors contributed equally

**Supplementary Information**

**Figure S1. Comparison of amino acid composition between HemoPI-1 dataset, random negative datasets (Random1-5) dataset, and Swiss-Prot.**

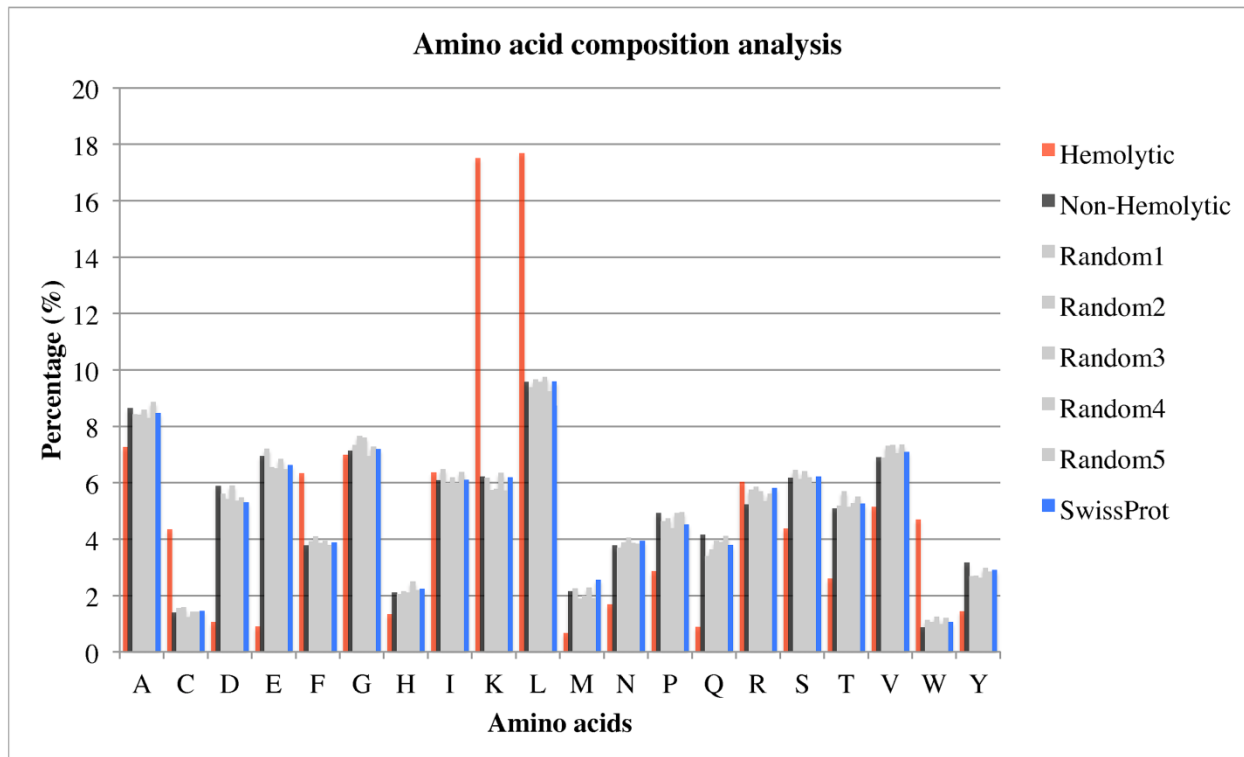

**Table S1: Rules for highly and poorly hemolytic peptides for HemoPI-3.**

| <b>Highly Hemolytic Peptides</b> |                       | <b>Poorly Hemolytic Peptides</b> |                       |
|----------------------------------|-----------------------|----------------------------------|-----------------------|
| <b>Hemolysis</b>                 | <b>Concentration</b>  | <b>Hemolysis</b>                 | <b>Concentration</b>  |
| $\geq 5\%$                       | $\leq 10\mu\text{M}$  | $\leq 2\%$                       | $\geq 10\mu\text{M}$  |
| $\geq 10\%$                      | $\leq 20\mu\text{M}$  | $\leq 5\%$                       | $\geq 20\mu\text{M}$  |
| $\geq 15\%$                      | $\leq 50\mu\text{M}$  | $\leq 10\%$                      | $\geq 50\mu\text{M}$  |
| $\geq 20\%$                      | $\leq 100\mu\text{M}$ | $\leq 15\%$                      | $\geq 100\mu\text{M}$ |
| $\geq 30\%$                      | $\leq 200\mu\text{M}$ | $\leq 20\%$                      | $\geq 200\mu\text{M}$ |
| $\geq 50\%$                      | $\leq 300\mu\text{M}$ | $\leq 30\%$                      | $\geq 300\mu\text{M}$ |
| MHC                              | $\leq 50\mu\text{M}$  | $\leq 50\%$                      | $\geq 500\mu\text{M}$ |
|                                  |                       | MHC                              | $\geq 100\mu\text{M}$ |

**Table S2. Performance of amino acid composition-based SVM model using five-fold cross-validation on HemoPI-3 main dataset**

| <b>Approach</b>      | <b>Sn%</b> | <b>Sp%</b> | <b>Acc%</b> | <b>MCC</b> |
|----------------------|------------|------------|-------------|------------|
| <b>Whole peptide</b> | 79.24      | 76.48      | 77.98       | 0.56       |
| <b>NT10</b>          | 70.33      | 66.74      | 68.71       | 0.37       |
| <b>CT10</b>          | 70.38      | 65.42      | 68.12       | 0.36       |
| <b>NTCT10</b>        | 77.83      | 74.91      | 76.52       | 0.53       |
| <b>NT15</b>          | 75.71      | 71.52      | 74.05       | 0.47       |
| <b>CT15</b>          | 71.37      | 73.98      | 72.42       | 0.45       |
| <b>NTCT15</b>        | 82.81      | 78.23      | 81.00       | 0.61       |

**Performance of amino acid composition based model on validation dataset.**

| <b>Approach</b>      | <b>Sn%</b> | <b>Sp%</b> | <b>Acc%</b> | <b>MCC</b> |
|----------------------|------------|------------|-------------|------------|
| <b>Whole peptide</b> | 81.92      | 71.43      | 77.16       | 0.54       |
| <b>NTCT15</b>        | 79.72      | 64.52      | 73.73       | 0.45       |

**Sn:** Sensitivity; **Sp:** Specificity; **Acc:** Accuracy; **MCC:** Matthews correlation coefficient.

**Table S3. Performance of whole peptide amino acid composition based models using different machine learning algorithms on HemoPI-3 dataset.**

| <b>Method</b>                    | <b>Sn%</b> | <b>Sp%</b> | <b>Acc%</b> | <b>MCC</b> |
|----------------------------------|------------|------------|-------------|------------|
| <b>SVM</b>                       | 79.24      | 76.48      | 77.98       | 0.56       |
| <b>IBK</b>                       | 77.54      | 71.24      | 74.67       | 0.49       |
| <b>Multilayer<br/>Perceptron</b> | 71.19      | 73.10      | 72.06       | 0.44       |
| <b>Logistic</b>                  | 66.81      | 64.97      | 65.97       | 0.32       |
| <b>J48</b>                       | 72.88      | 67.17      | 70.28       | 0.40       |
| <b>Random Forest</b>             | 80.37      | 77.16      | 78.91       | 0.57       |

**Sn:** Sensitivity; **Sp:** Specificity; **Acc:** Accuracy; **MCC:** Matthews correlation coefficient.

**Table S4. Performance of amino acid composition-based SVM models for Random1-5 main datasets for predicting hemotoxicity of peptides using five-fold cross-validation.**

| <b>Datasets</b>  | <b>Sn (%)</b> | <b>Sp (%)</b> | <b>Acc (%)</b> | <b>MCC</b> |
|------------------|---------------|---------------|----------------|------------|
| HemoPI-1 Random1 | 91.4          | 96.6          | 94             | 0.88       |
| HemoPI-1 Random2 | 94.8          | 94.8          | 94.8           | 0.90       |
| HemoPI-1 Random3 | 94.3          | 93.2          | 93.8           | 0.88       |
| HemoPI-1 Random4 | 93            | 94.6          | 93.8           | 0.88       |
| HemoPI-1 Random5 | 95.3          | 94.6          | 95             | 0.90       |

**Sn:** Sensitivity; **Sp:** Specificity; **Acc:** Accuracy; **MCC:** Matthews correlation coefficient.

**Table S5. Performance of dipeptide composition-based SVM models using five-fold cross-validation on HemoPI-3 main dataset**

| <b>Approach</b>      | <b>Sn%</b> | <b>Sp%</b> | <b>Acc%</b> | <b>MCC</b> |
|----------------------|------------|------------|-------------|------------|
| <b>Whole peptide</b> | 78.39      | 78.68      | 78.52       | 0.57       |
| <b>NT10</b>          | 71.98      | 68.74      | 70.51       | 0.41       |
| <b>CT10</b>          | 72.47      | 67.08      | 70.01       | 0.40       |
| <b>NTCT10</b>        | 79.76      | 77.12      | 78.58       | 0.57       |
| <b>NT15</b>          | 74.29      | 76.16      | 75.03       | 0.50       |
| <b>CT15</b>          | 72.94      | 75.44      | 73.94       | 0.48       |
| <b>NTCT15</b>        | 81.93      | 83.06      | 82.38       | 0.64       |

  

| <b>Performance of dipeptide composition based model on validation dataset</b> |            |            |             |            |
|-------------------------------------------------------------------------------|------------|------------|-------------|------------|
| <b>Approach</b>                                                               | <b>Sn%</b> | <b>Sp%</b> | <b>Acc%</b> | <b>MCC</b> |
| <b>Whole peptide</b>                                                          | 77.97      | 70.07      | 74.38       | 0.48       |
| <b>NTCT15</b>                                                                 | 76.22      | 67.74      | 72.88       | 0.44       |

**Sn:** Sensitivity; **Sp:** Specificity; **Acc:** Accuracy; **MCC:** Matthews correlation coefficient.

**Table S6. Performance of binary profile-based SVM models using five-fold cross-validation on HemoPI-3 main dataset**

| <b>Approach</b> | <b>Sn%</b> | <b>Sp%</b> | <b>Acc%</b> | <b>MCC</b> |
|-----------------|------------|------------|-------------|------------|
| <b>NT10</b>     | 71.61      | 68.29      | 70.11       | 0.40       |
| <b>CT10</b>     | 68.47      | 69.36      | 68.87       | 0.38       |
| <b>NTCT10</b>   | 80.80      | 75.09      | 78.25       | 0.56       |
| <b>NT15</b>     | 74.70      | 73.68      | 74.30       | 0.48       |
| <b>CT15</b>     | 75.29      | 70.76      | 73.47       | 0.46       |
| <b>NTCT15</b>   | 83.16      | 76.61      | 80.57       | 0.60       |

**Performance of binary composition based model on validation dataset.**

| <b>Approach</b> | <b>Sn%</b> | <b>Sp%</b> | <b>Acc%</b> | <b>MCC</b> |
|-----------------|------------|------------|-------------|------------|
| <b>NTCT15</b>   | 81.82      | 64.52      | 75.00       | 0.47       |

**Sn:** Sensitivity; **Sp:** Specificity; **Acc:** Accuracy; **MCC:** Matthews correlation coefficient.
